# Supplementary material for: Selective catalytic reduction of NOx with NH3 over TiO2 supported metal sulfate catalysts prepared via a sol–gel protocol
Source: Royal Society of Chemistry journal article supplement (doi:10.1039/d0nj02647f), 2020-01-01
Supplement: d0nj02647f1.pdf [file d0nj02647f1.pdf]

## Selective catalytic reduction of NO with NH<sub>3</sub> over TiO<sub>2</sub> supported metal sulfate catalysts prepared via a sol-gel protocol

Yanke Yu<sup>a</sup>, Jiali Zhang<sup>ab</sup>, Changwei Chen<sup>a</sup>, Mudi Ma<sup>a</sup>, Chi He<sup>\*ac</sup>, Jifa Miao<sup>d</sup>, Huirong Li<sup>d</sup> and Jinsheng Chen<sup>\*d</sup>

<sup>a</sup>. Department of Environmental Science and Engineering, School of Energy and Power Engineering, Xi'an Jiaotong University, Xi'an 710049, P.R. China Address here.

<sup>b</sup>. College of Geology and Environment, Xi'an University of Science and Technology, Xi'an 710054, P.R. China.

<sup>c</sup>. National Engineering Laboratory for VOCs Pollution Control Material & Technology, University of Chinese Academy of Sciences, Beijing 101408, P.R. China.

<sup>d</sup>. Center for Excellence in Regional Atmospheric Environment, Institute of Urban Environment, Chinese Academy of Sciences, Xiamen, 361021, P.R. China

Table S1 The distribution of acid sites on metal sulfate catalysts (%)

| Sample  | Weak acid sites | Medium strong acid sites | Strong acid sites |
|---------|-----------------|--------------------------|-------------------|
| Cu-S/Ti | 51.1            | 37.5                     | 11.4              |
| Fe-S/Ti | 33.0            | 37.4                     | 29.6              |
| Mn-S/Ti | 20.7            | 40.9                     | 38.4              |
| Ce-S/Ti | 27.7            | 40.3                     | 32.0              |
| Co-S/Ti | 33.1            | 48.8                     | 18.1              |

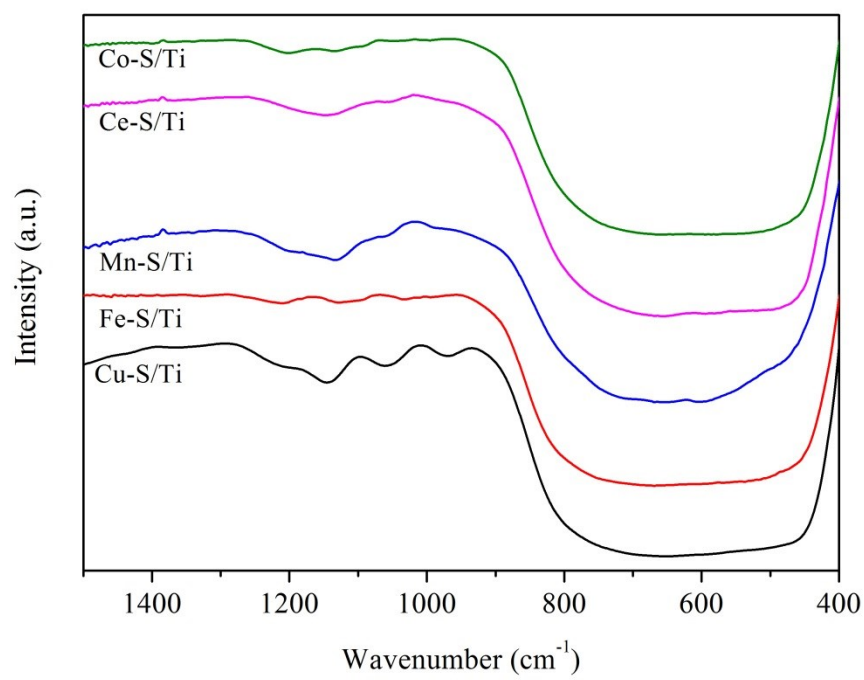

Figure S1. FT-IR result of each metal sulfate catalyst.

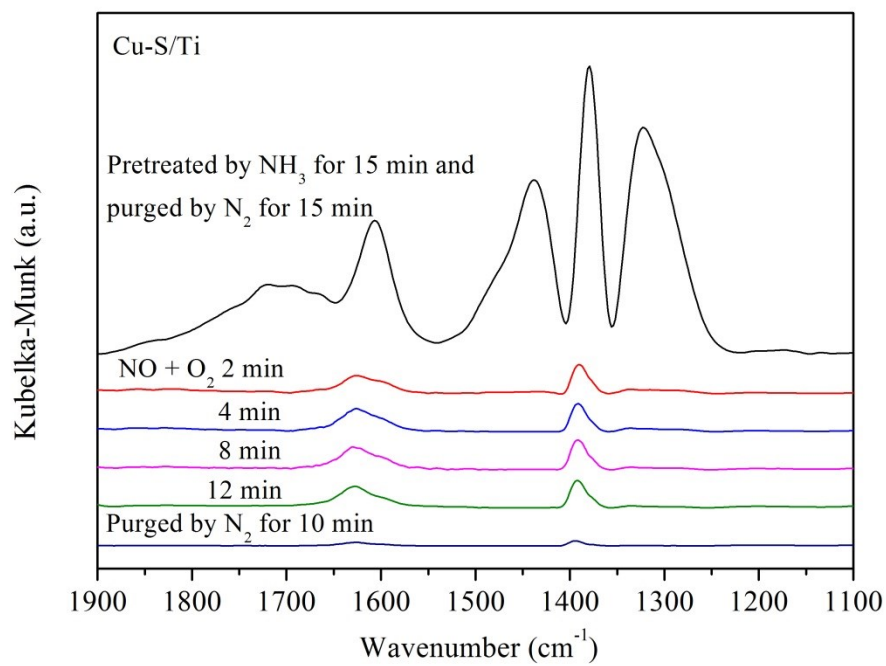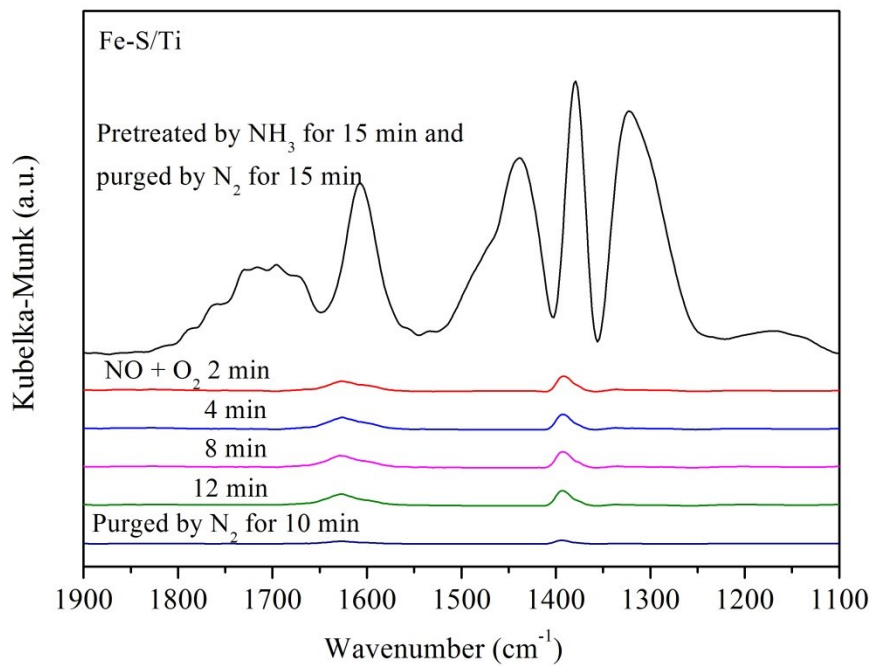

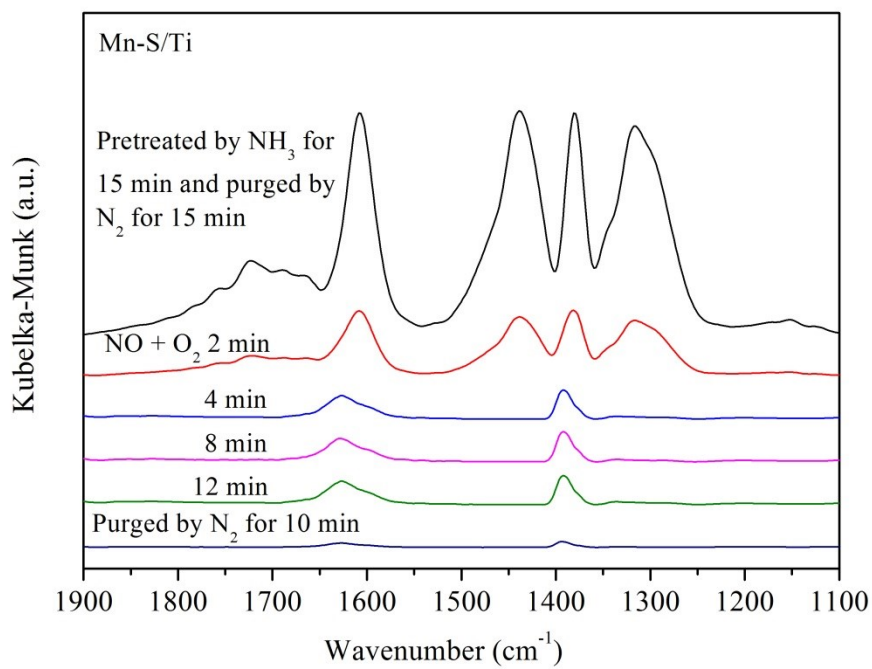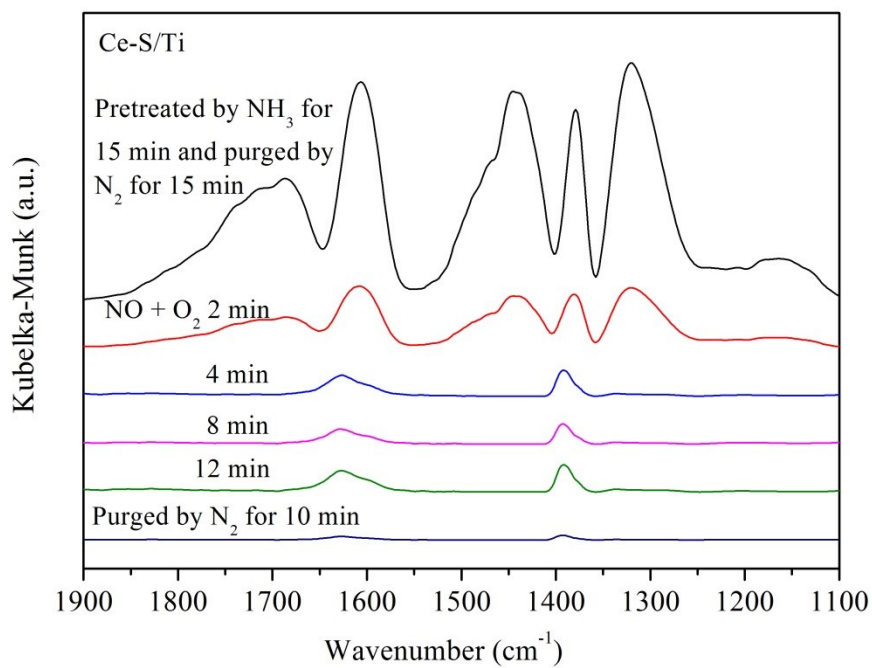

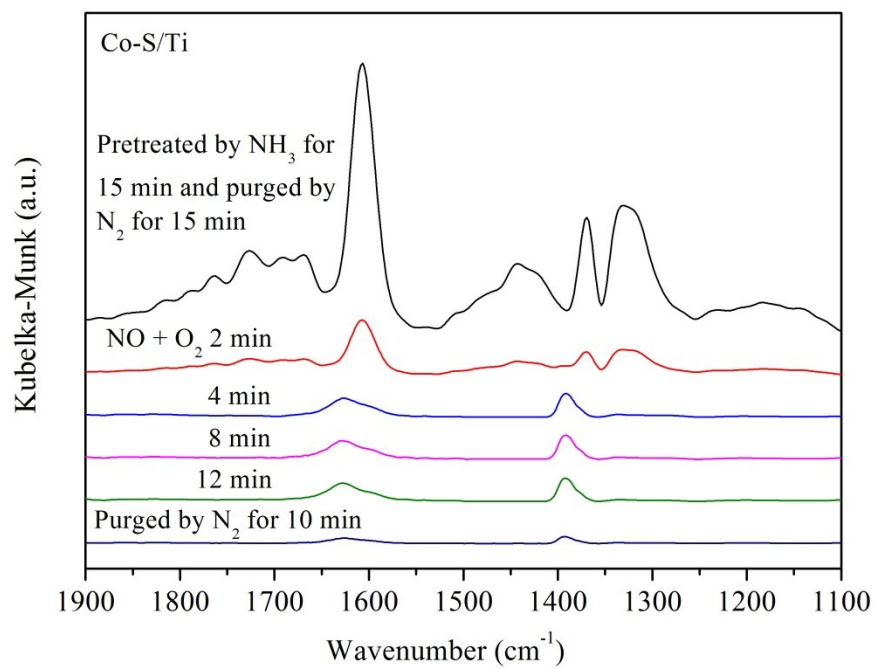

Figure S2. *In situ* DRIFTS of  $\text{NO} + \text{O}_2$  on metal sulfate catalysts pretreated by  $\text{NH}_3$  at 350 °C.
